# Supplementary material
Source: PubMed Central journal article supplement (PMC2720918)
Supplement: supp_122_5_611__1.pdf [file supp_122_5_611__1.pdf]

**Table S1.** Sequences/species used for the phylogenetic analysis presented in Figure 1.

|                    |                |                                       |                           | B9 Family Members       |                    |              |        |
|--------------------|----------------|---------------------------------------|---------------------------|-------------------------|--------------------|--------------|--------|
| Supergroup         | Subgroup       | Species                               | Ciliated?                 | NCBI Accession          | Species Accession  | Clade        |        |
| Plantae            | Bryophyta      | <i>Physcomitrella patens</i>          | yes                       | No B9 proteins observed | -                  | -            |        |
|                    | Chlorophyta    | <i>Chlamydomonas reinhardtii</i>      | yes                       | XP_001693128.1          | 137074             | MKSR-2       |        |
|                    |                |                                       |                           | XP_001695895.1          | 130473 (Mks1-like) | MKSR-1       |        |
|                    |                |                                       |                           | XP_001698587.1          | 187742             | MKSR-2       |        |
|                    |                |                                       |                           | XP_001700551            | POC12              | MKS-1        |        |
|                    | Prasinophyta   | <i>Ostreococcus lucimarinus</i>       | no                        | No B9 proteins observed | -                  | -            |        |
|                    | Tracheophyta   | <i>Arabidopsis thaliana</i>           | no                        | No B9 proteins observed | -                  | -            |        |
|                    | Excavates      | Kinetoplastids                        | <i>Trypanosoma brucei</i> | yes                     | XP_827924.1        | Tb10.61.2290 | MKSR-1 |
|                    |                |                                       |                           |                         | XP_828130.1        | Tb11.03.0750 | MKSR-2 |
|                    |                |                                       |                           |                         | XP_847174          | Tb927.8.3430 | MKS-1  |
| XP_001683785       |                |                                       |                           |                         | n/a                | MKSR-2       |        |
| XP_001685341       |                |                                       |                           |                         | n/a                | MKSR-1       |        |
| Diplomonads        |                | <i>Giardia lamblia</i>                | yes                       | XP_001683495            | LmjF23.1710        | MKS-1        |        |
|                    |                |                                       |                           | No B9 proteins observed | -                  | -            |        |
|                    |                |                                       |                           | No B9 proteins observed | -                  | -            |        |
|                    |                |                                       |                           | No B9 proteins observed | -                  | -            |        |
|                    |                |                                       |                           | No B9 proteins observed | -                  | -            |        |
| Opisthokonts       | Ascomycetes    | <i>Saccharomyces cerevisiae</i>       | no                        | No B9 proteins observed | -                  | -            |        |
|                    | Basidiomycetes | <i>Phanerochaete chrysosporium</i>    | no                        | No B9 proteins observed | -                  | -            |        |
|                    | Zygomycetes    | <i>Rhizopus oryzae</i>                | no                        | No B9 proteins observed | -                  | -            |        |
|                    | Chytrids       | <i>Batrachochytrium dendrobatidis</i> | yes                       | n/a                     | BDEG_03036.1       | MKSR-1       |        |
|                    |                |                                       |                           | n/a                     | BDEG_03725.1       | MKSR-2       |        |
|                    |                |                                       |                           | n/a                     | BDEG_00264.1       | MKS-1        |        |
|                    | Animals        | <i>Homo sapiens</i>                   | yes                       | NP_056496.1             | B9D1               | MKSR-1       |        |
|                    |                |                                       |                           | NP_085055.1             | B9D2               | MKSR-2       |        |
|                    |                |                                       |                           | AAH10061.1              | MKS1               | MKS-1        |        |
|                    |                |                                       |                           | NP_038745.1             | B9D1               | MKSR-1       |        |
| NP_742160.1        |                |                                       |                           | B9D2                    | MKSR-2             |              |        |
| EDL15835.1         |                |                                       |                           | MKS1                    | MKS-1              |              |        |
| NP_001085984.1     |                |                                       |                           | MGC82986                | MKSR-2             |              |        |
| NP_001090590.1     |                |                                       |                           | Meckelst1               | MKS-1              |              |        |
| NP_001086557.1     |                |                                       |                           | MGC83744                | MKSR-1             |              |        |
| NP_001002394.1     |                |                                       |                           | LOC436667               | MKSR-2             |              |        |
| <i>Danio rerio</i> | yes            | NP_001019544.1                        | B9like                    | MKSR-1                  |                    |              |        |
|                    |                | CAM56561.1                            | Mks1like                  | MKS-1                   |                    |              |        |

|                        |               |                                      |     |                         |                 |        |
|------------------------|---------------|--------------------------------------|-----|-------------------------|-----------------|--------|
|                        |               | <i>Drosophila melanogaster</i>       | yes | NP_608998.1             | CG9227          | MKSR-2 |
|                        |               |                                      |     | NP_650470.1             | CG14870         | MKSR-1 |
|                        |               |                                      |     | NP_572804.1             | CG15730         | MKS-1  |
|                        |               | <i>Apis mellifera</i>                | yes | XP_393962.2             | 66524364        | MKSR-1 |
|                        |               |                                      |     | XP_001120316.1          | 110748825       | MKS-1  |
|                        |               |                                      |     | XP_001120495.1          | 110750832       | MKSR-2 |
|                        |               | <i>Caenorhabditis elegans</i>        | yes | NP_500186.1             | Y38F2AL.2       | MKSR-2 |
|                        |               |                                      |     | NP_497669.1             | R148.1          | MKS-1  |
|                        |               |                                      |     | NP_508203.1             | K03E6.4         | MKSR-1 |
|                        |               | <i>Caenorhabditis briggsae</i>       | yes | XP_001677167            | CBP10354        | MKSR-2 |
|                        |               |                                      |     | CAE65900                | CBP08737        | MKSR-1 |
|                        |               |                                      |     | XP_001664663            | CBP20416        | MKS-1  |
|                        |               | <i>Strongylocentrotus purpuratus</i> | yes | XP_795184.2             | B9-like         | MKSR-1 |
|                        |               |                                      |     | XP_787637               | FABBlke         | MKS-1  |
|                        |               |                                      |     | XP_001175727            | B9              | MKSR-2 |
|                        |               | <i>Nematostella vectensis</i>        | yes | XP_001618299            | 225297          | MKSR-2 |
|                        |               |                                      |     | XP_001631460            | 209121          | MKS-1  |
|                        |               |                                      |     | XP_001636548            | 241009          | MKSR-1 |
| <b>Amoebozoa</b>       | Dictyostelids | <i>Dictyostelium discoideum</i>      | no  | No B9 proteins observed | -               | -      |
|                        |               |                                      |     |                         |                 |        |
| <b>Chromalveolates</b> | Apicomplexans | <i>Plasmodium falciparum</i>         | yes | No B9 proteins observed | -               | -      |
|                        |               | <i>Cryptosporidium parvum</i>        | no  | No B9 proteins observed | -               | -      |
|                        | Ciliates      | <i>Tetrahymena thermophila</i>       | yes | XP_001022773.1          | TTHERM_00630490 | MKS-1  |
|                        |               |                                      |     | XP_001020583.2          | TTHERM_00219110 | MKSR-1 |
|                        |               |                                      |     | XP_001030337.2          | TTHERM_01099210 | MKSR-2 |
|                        |               |                                      |     | XP_001010073.1          | TTHERM_00633350 | MKSR-2 |
|                        |               | <i>Paramecium tetraurelia</i>        | yes | XP_001426697.1          | hypB9a          | MKSR-1 |
|                        |               |                                      |     | XP_001432714.1          | hypB9c          | MKSR-2 |
|                        |               |                                      |     | XP_001441845.1          | hypB9d          | MKSR-2 |
|                        |               |                                      |     | XP_001443728.1          | hypB9e          | MKS-1  |
|                        | Diatom        | <i>Thalassiosira pseudonana</i>      | yes | n/a                     | 38153           | MKSR-2 |
|                        |               |                                      |     | n/a                     | 5008            | MKS-1  |
|                        |               |                                      |     | n/a                     | 264691          | MKSR-1 |

<sup>1</sup>Classification scheme according to Keeling et al. (Keeling et al., 2005) The tree of eukaryotes *Trends Ecol. Evol.* **20**, 670-676.
